# Supplementary material
Source: PubMed Central journal article supplement (PMC3457568)
Supplement: IAI.00321-12_zii999099816so1.pdf [file IAI.00321-12_zii999099816so1.pdf]

**Figure S1**

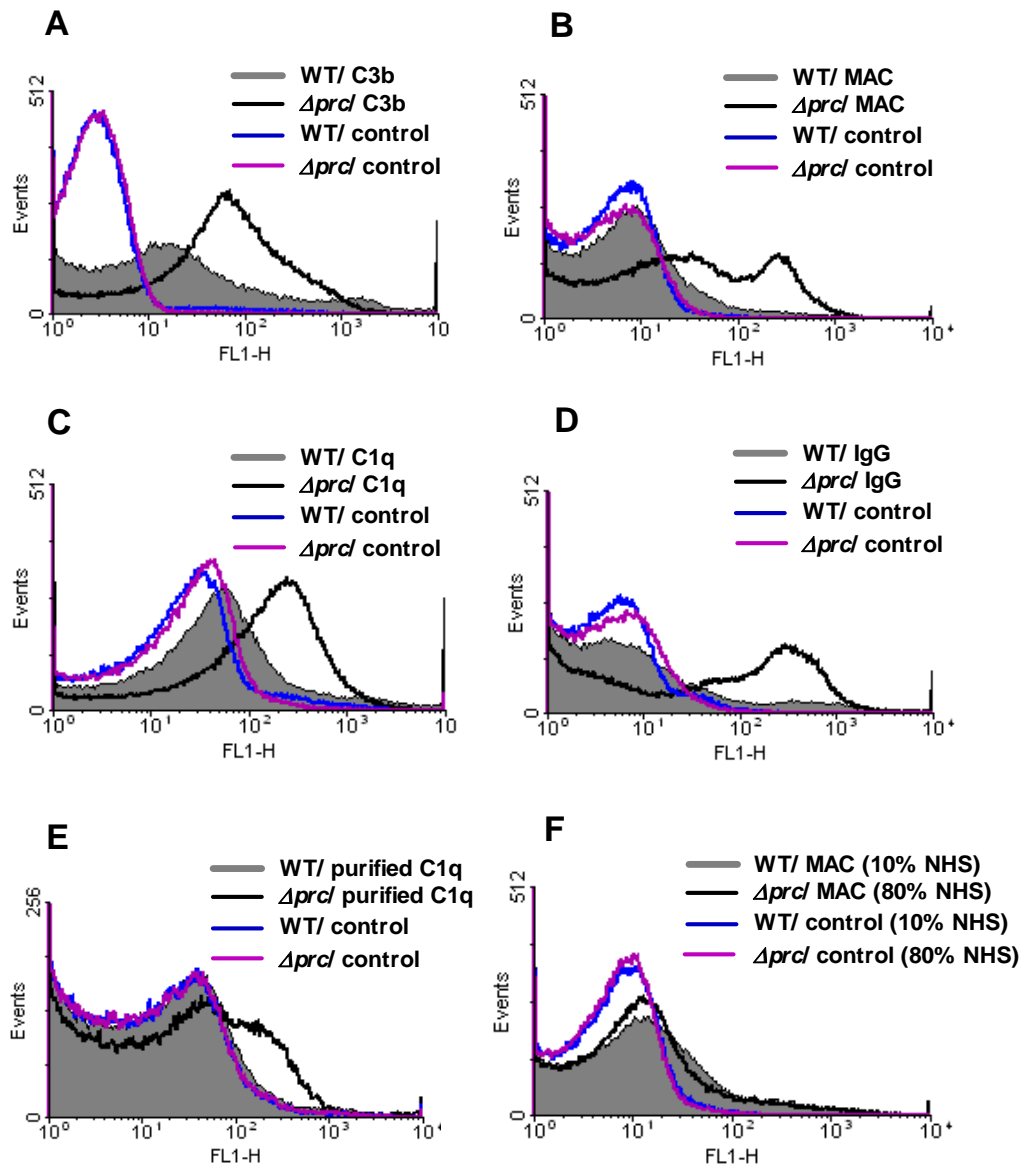

Fig.S1. Representative histograms of the flow cytometry results for complement components and IgG deposition shown in this study. (A), (B), (C), (D), (E), and (F) are the representative histograms of figures 3A, 3B, 3F, 4A, 4C, and 6C, respectively. The histograms are the results of 15 min incubation of bacterial strains with serum or purified C1q.

## Figure S2

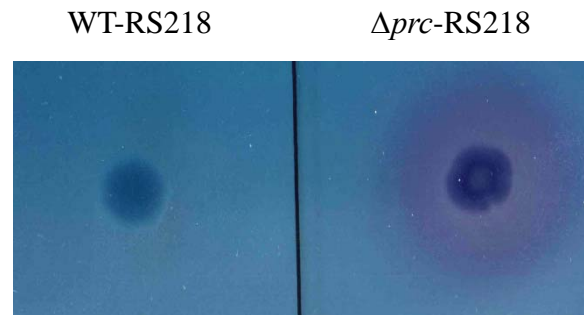

Fig. S2. RNase leakage analyses of WT-RS218 and  $\Delta prc$ -RS218. The bacteria were grown on a RNase test agar plate. The pink halo around the  $\Delta prc$ -RS218 colony indicates a significant leakage of periplasmic RNase into the agar. This result suggests that deletion of Prc increases the permeability of the outer membrane of *E. coli* strain RS218.
